# Supplementary material for: Probing the bonding of CO to heteronuclear group 4 metal–nickel clusters by photoelectron spectroscopy
Source: Royal Society of Chemistry journal article supplement (doi:10.1039/c7cp00171a), 2017-01-01
Supplement: c7cp00171a1.pdf [file c7cp00171a1.pdf]

## Electronic Supplementary Information (ESI)

### Probing the CO bonding to heteronuclear group 4 metal-nickel clusters by photoelectron spectroscopy

Jinghan Zou,<sup>1,2,#</sup> Hua Xie,<sup>1,#</sup> Qinqin Yuan,<sup>1,2</sup> Jumei Zhang,<sup>1,2</sup> Dongxu Dai,<sup>1</sup> Hongjun Fan,<sup>1</sup> Zichao Tang,<sup>3</sup> and Ling Jiang<sup>1,\*</sup>

<sup>1</sup>*State Key Laboratory of Molecular Reaction Dynamics, Collaborative Innovation Center of Chemistry for Energy and Materials (iChEM), Dalian Institute of Chemical Physics, Chinese Academy of Sciences, 457 Zhongshan Road, Dalian 116023, Liaoning, P. R. China*

<sup>2</sup>*University of Chinese Academy of Sciences, 19A Yuquan Road, Beijing 100049, P. R. China*

<sup>3</sup>*State Key Laboratory of Physical Chemistry of Solid Surfaces, Department of Chemistry, College of Chemistry and Chemical Engineering, Xiamen University, Xiamen 361005, P. R. China*

\*E-mail address: [ljiang@dicp.ac.cn](mailto:ljiang@dicp.ac.cn).

# These authors contributed equally to this work

Table S1. Comparison of experimental VDE and ADE values (eV) to BP86 calculated ones of the five lowest-energy isomers for  $\text{ZrNi}(\text{CO})_n^-$  ( $n = 3-7$ ).

| Cluster | Isomer | VDE               |       | ADE               |       |
|---------|--------|-------------------|-------|-------------------|-------|
|         |        | Exp. <sup>a</sup> | Calc. | Exp. <sup>a</sup> | Calc. |
| $n=3$   | 3-I    | 2.04(7)           | 2.32  | 1.86(8)           | 2.11  |
|         | 3-II   |                   | 1.89  |                   | 1.79  |
|         | 3-III  |                   | 2.16  |                   | 2.05  |
|         | 3-IV   |                   | 1.85  |                   | 1.71  |
|         | 3-V    |                   | 1.93  |                   | 1.88  |
| $n=4$   | 4-I    | 2.62(4)           | 2.51  | 2.31(6)           | 2.15  |
|         | 4-II   |                   | 2.37  |                   | 2.23  |
|         | 4-III  |                   | 2.69  |                   | 2.47  |
|         | 4-IV   |                   | 2.27  |                   | 2.05  |
|         | 4-V    |                   | 2.38  |                   | 2.01  |
| $n=5$   | 5-I    | 3.01(2)           | 3.21  | 2.62(4)           | 2.67  |
|         | 5-II   |                   | 3.13  |                   | 2.60  |
|         | 5-III  |                   | 2.91  |                   | 2.65  |
|         | 5-IV   |                   | 2.63  |                   | 2.49  |
|         | 5-V    |                   | 2.58  |                   | 2.43  |
| $n=6$   | 6-I    | —                 | 3.28  | —                 | 2.90  |
|         | 6-II   |                   | 3.01  |                   | 2.62  |
|         | 6-III  |                   | 2.79  |                   | 2.64  |
|         | 6-IV   |                   | 2.90  |                   | 2.62  |
|         | 6-V    |                   | 2.83  |                   | 2.56  |
| $n=7$   | 7-I    | —                 | 3.23  | —                 | 2.81  |
|         | 7-II   |                   | 3.09  |                   | 2.80  |
|         | 7-III  |                   | 3.39  |                   | 3.06  |
|         | 7-IV   |                   | 2.99  |                   | 2.65  |
|         | 7-V    |                   | 2.89  |                   | 2.57  |

<sup>a</sup> Numbers in parentheses represent the uncertainty in the last digit.

Table S2. Comparison of experimental VDE and ADE values (eV) to BP86 calculated ones of the five lowest-energy isomers for  $\text{HfNi}(\text{CO})_n^-$  ( $n = 3-7$ ).

| Cluster | Isomer | VDE               |       | ADE               |       |
|---------|--------|-------------------|-------|-------------------|-------|
|         |        | Exp. <sup>a</sup> | Calc. | Exp. <sup>a</sup> | Calc. |
| $n = 3$ | 3-i    | 2.09(8)           | 2.24  | 1.91(8)           | 2.02  |
|         | 3-ii   |                   | 2.00  |                   | 1.93  |
|         | 3-iii  |                   | 2.34  |                   | 2.10  |
|         | 3-iv   |                   | 1.95  |                   | 1.74  |
|         | 3-v    |                   | 2.25  |                   | 2.18  |
| $n = 4$ | 4-i    | 2.68(4)           | 2.69  | 2.40(5)           | 2.44  |
|         | 4-ii   |                   | 2.40  |                   | 2.27  |
|         | 4-iii  |                   | 2.32  |                   | 2.20  |
|         | 4-iv   |                   | 2.24  |                   | 2.10  |
|         | 4-v    |                   | 2.39  |                   | 2.16  |
| $n = 5$ | 5-i    | 3.11(2)           | 3.37  | 2.67(4)           | 2.69  |
|         | 5-ii   |                   | 2.76  |                   | 2.58  |
|         | 5-iii  |                   | 2.87  |                   | 2.63  |
|         | 5-iv   |                   | 2.64  |                   | 2.17  |
|         | 5-v    |                   | 2.56  |                   | 2.43  |
| $n = 6$ | 6-i    | —                 | 3.36  | —                 | 3.01  |
|         | 6-ii   |                   | 2.97  |                   | 2.66  |
|         | 6-iii  |                   | 2.81  |                   | 2.54  |
|         | 6-iv   |                   | 2.92  |                   | 2.60  |
|         | 6-v    |                   | 2.83  |                   | 2.51  |
| $n = 7$ | 7-i    | —                 | 3.22  | —                 | 2.87  |
|         | 7-ii   |                   | 3.10  |                   | 2.82  |
|         | 7-iii  |                   | 3.37  |                   | 3.07  |
|         | 7-iv   |                   | 3.03  |                   | 2.69  |
|         | 7-v    |                   | 2.88  |                   | 2.53  |

<sup>a</sup> Numbers in parentheses represent the uncertainty in the last digit.

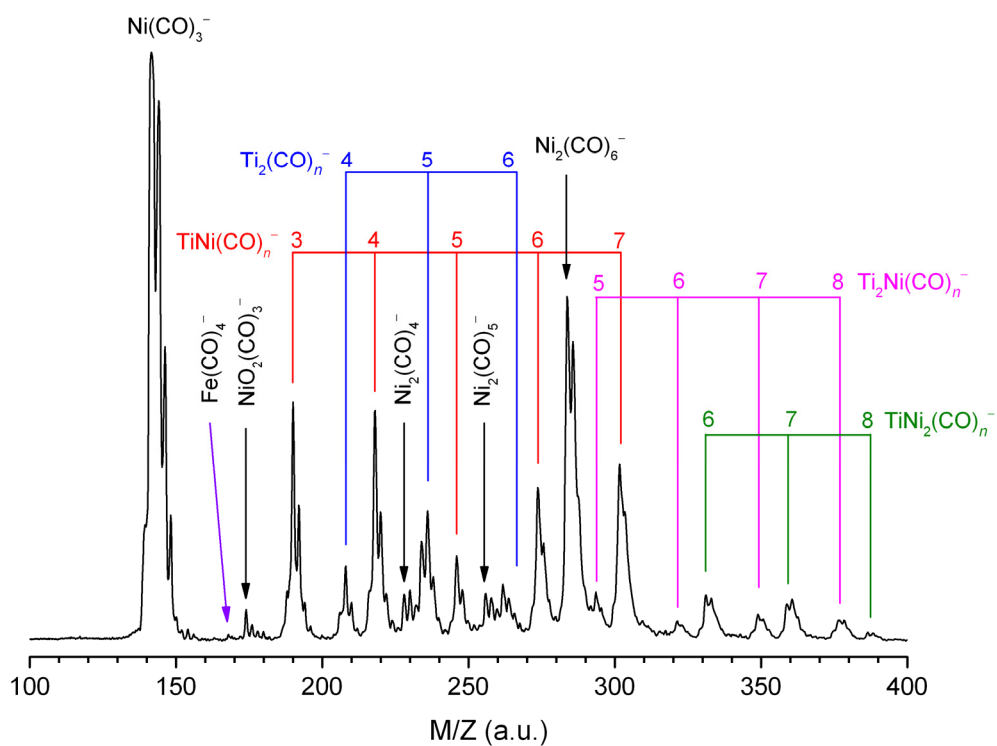

Fig. S1 Time-of-flight mass spectrum of the anions produced by pulsed laser vaporization of titanium metal target in an expansion of 5% CO seeded in He. Qualitatively similar time-of-flight spectra are obtained following ablation of zirconium and hafnium targets.

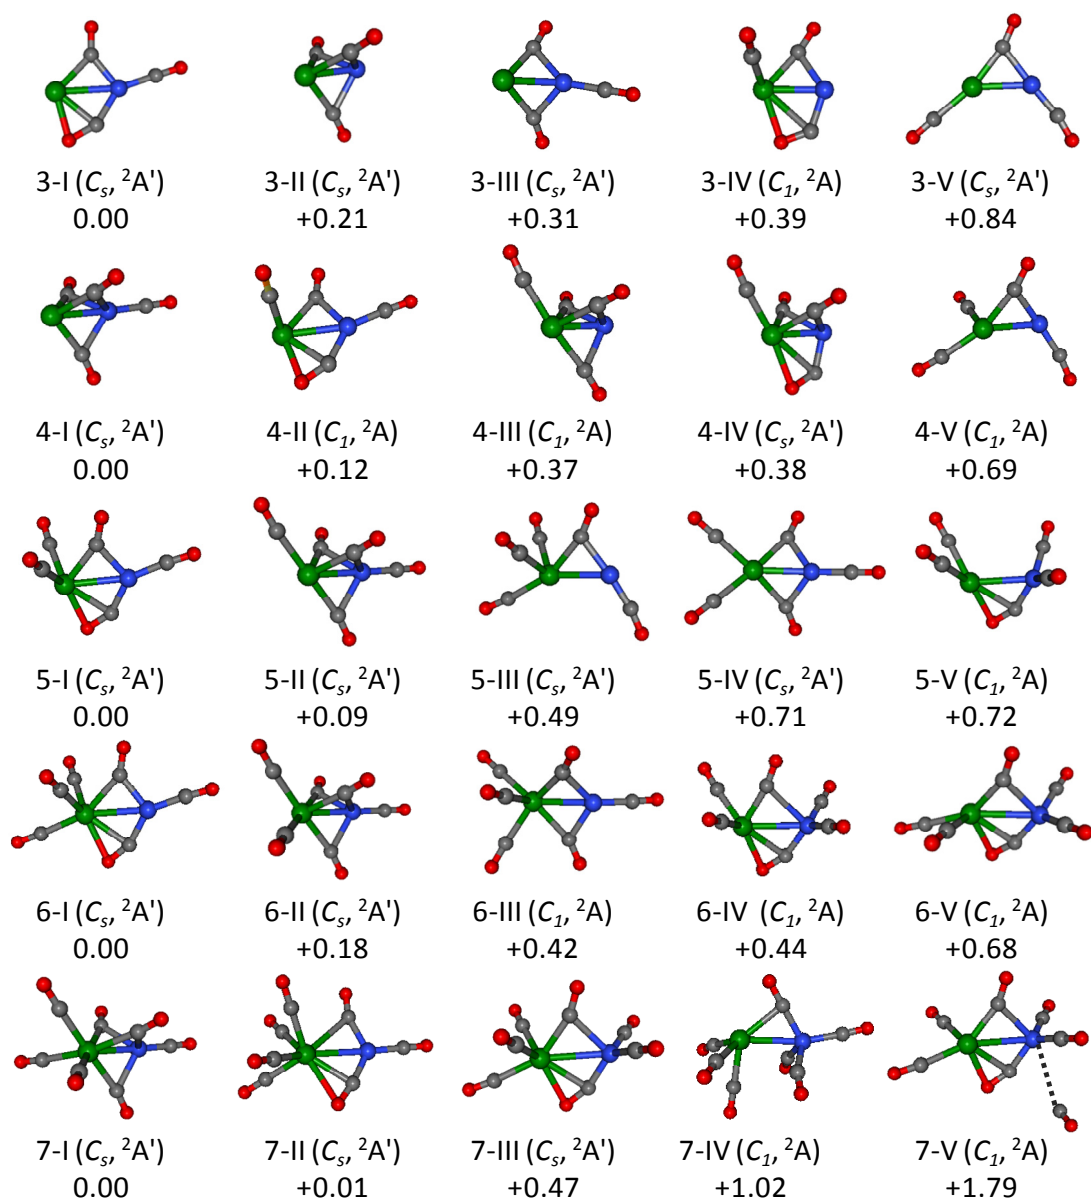

Fig. S2 Optimized structures of the  $ZrNi(CO)_n^-$  ( $n = 3-7$ ) anions (Zr, green; Ni, blue; C, gray; O, red). Relative energies are given in eV.

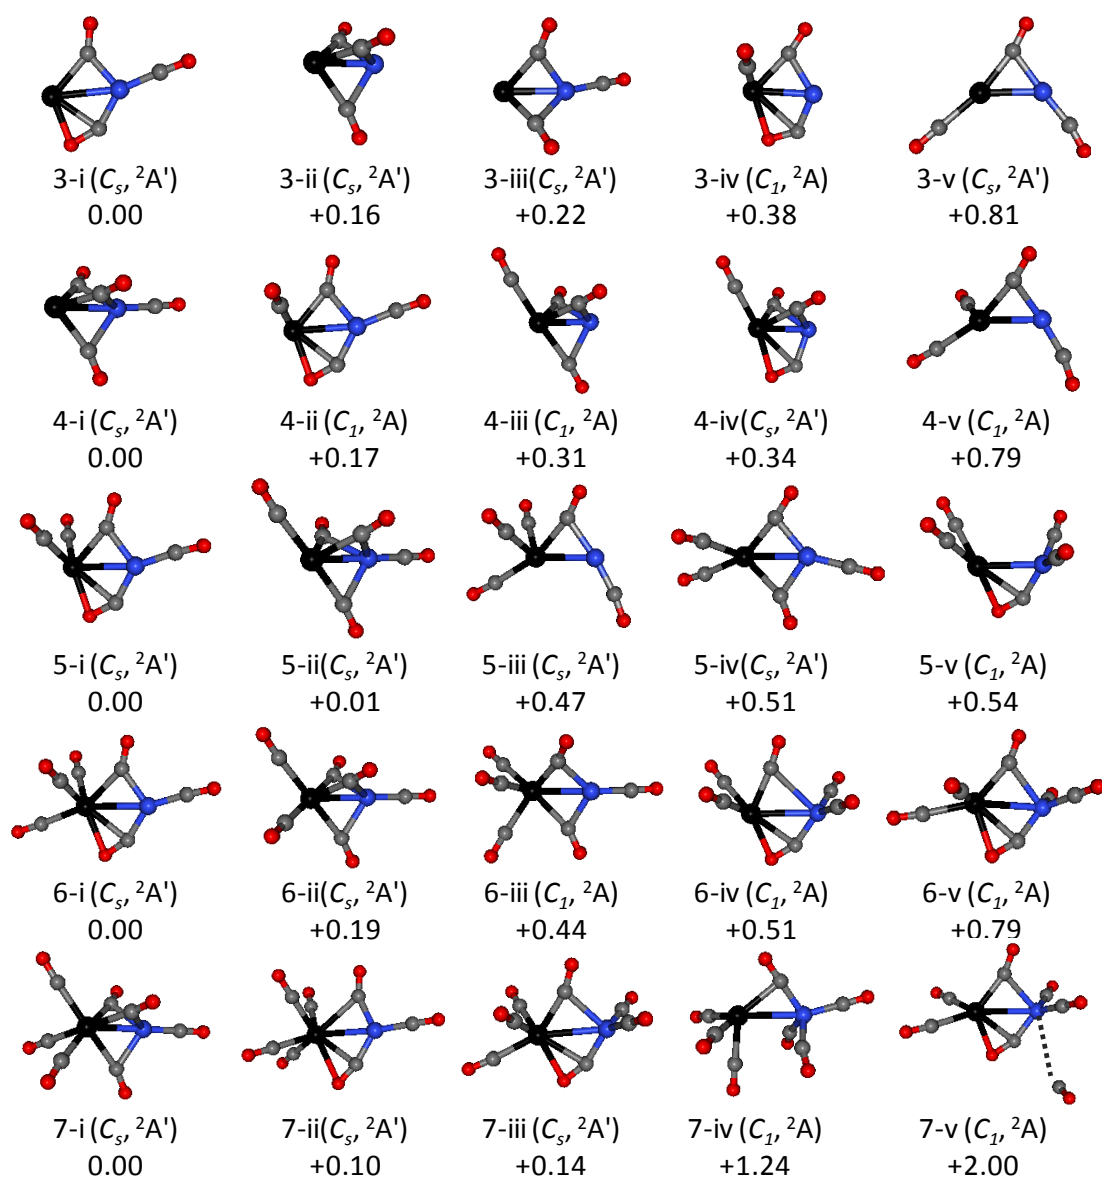

Fig. S3 Optimized structures of the  $\text{HfNi}(\text{CO})_n^-$  ( $n = 3-7$ ) anions (Hf, black; Ni, blue; C, gray; O, red). Relative energies are given in eV.
